# Supplementary material for: Combining Fuzzy, Multicriteria and Mapping Techniques to Assess Soil Fertility for Agricultural Development: A Case Study of Firozabad District, Uttar Pradesh, India
Source: MDPI journal article supplement (doi:10.3390/land12040860), 2023-04-11
Supplement: s1 [file s1]

Table S1: Rating of soil physical and chemical indicators

| Indicators                                        |                          | Indicator rating |               |               |               |           |
|---------------------------------------------------|--------------------------|------------------|---------------|---------------|---------------|-----------|
| <i>Macronutrient elements</i>                     | Unit                     | 100              | 80            | 50            | 20            | 10        |
| N                                                 | %                        | >0.32            | 0.32–0.17     | 0.09–0.17     | 0.09–0.045    | <0.045    |
| P                                                 | mg kg <sup>-1</sup>      | >80              | 25–80         | 8.0–25        | 2.5–8.0       | <2.5      |
| K                                                 | cmol(+) kg <sup>-1</sup> | 0.28–0.74        | 0.74–2.56     | 0.13–0.28     | >2.56         | <0.13     |
| Ca                                                | cmol(+) kg <sup>-1</sup> | 17.5–50          | 5.75–17.5     | 1.19–5.75     | >50           | <1.19     |
| S                                                 | cmol(+) kg <sup>-1</sup> | 0.0–0.20         | 0.21–0.30     | 0.31–0.70     | 0.71–2.0      | >2.0      |
| Mg                                                | cmol(+) kg <sup>-1</sup> | 1.33–4.0         | 4.0–12.5      | 0.42–1.33     | >12.5         | <0.42     |
| <i>Micronutrient elements</i>                     |                          |                  |               |               |               |           |
| Mn                                                | mg kg <sup>-1</sup>      | 14–50            | 4–14          | 50–170        | >170          | <4        |
| Zn                                                | mg kg <sup>-1</sup>      | 0.7–2.4          | 2.4–8.0       | 0.2–0.7       | >8.0          | <0.2      |
| Fe                                                | mg kg <sup>-1</sup>      | 2.0–4.5          | 1.0–2.0       | 1.0–0.2       | >4.5          | <0.2      |
| Cu                                                | mg kg <sup>-1</sup>      | >0.2             | –             | –             | –             | <0.2      |
| <i>Soil physical and chemical characteristics</i> |                          |                  |               |               |               |           |
| EC                                                | %/dS m <sup>-1</sup>     | 0–0.15/0–2       | 0.15–0.30/2–4 | 0.30–0.50/4–6 | 0.50–0.65/6–8 | >0.65/>8  |
| pH                                                | -                        | 6.5–7.5          | 7.5–8.5       | 5.5–6.5       | 4.5–5.5       | <4.5->8.5 |
| SOC                                               | %                        | >3               | 2–3           | 1–2           | 0.5–1         | 0–0.5     |

Table S2. Pairwise comparison matrix.

|   | 1    | 2    | 3    | 4    | 5    | 6    | 7    | 8    | 9    | 10   | 11   | 12   | 13   | 14   | 15   | 16   | 17   |
|---|------|------|------|------|------|------|------|------|------|------|------|------|------|------|------|------|------|
| 1 | 1    | 9.00 | 3.00 | 4.00 | 5.00 | 5.00 | 5.00 | 6.00 | 7.00 | 7.00 | 6.00 | 6.00 | 5.00 | 9.00 | 6.00 | 2.00 | 3.00 |
| 2 | 0.11 | 1    | 8.00 | 9.00 | 8.00 | 7.00 | 6.00 | 5.00 | 4.00 | 2.00 | 3.00 | 4.00 | 5.00 | 6.00 | 7.00 | 8.00 | 9.00 |
| 3 | 0.33 | 0.12 | 1    | 5.00 | 4.00 | 3.00 | 2.00 | 3.00 | 4.00 | 5.00 | 6.00 | 7.00 | 8.00 | 9.00 | 8.00 | 7.00 | 6.00 |
| 4 | 0.25 | 0.11 | 0.20 | 1    | 3.00 | 2.00 | 3.00 | 4.00 | 5.00 | 6.00 | 7.00 | 8.00 | 9.00 | 8.00 | 7.00 | 5.00 | 4.00 |
| 5 | 0.20 | 0.12 | 0.25 | 0.33 | 1    | 3.00 | 4.00 | 5.00 | 6.00 | 7.00 | 8.00 | 9.00 | 8.00 | 7.00 | 6.00 | 5.00 | 4.00 |

|    |      |      |      |      |      |      |      |      |      |      |      |      |      |      |      |      |      |
|----|------|------|------|------|------|------|------|------|------|------|------|------|------|------|------|------|------|
| 6  | 0.20 | 0.14 | 0.33 | 0.50 | 0.33 | 1    | 3.00 | 4.00 | 5.00 | 6.00 | 7.00 | 8.00 | 9.00 | 8.00 | 7.00 | 5.00 | 4.00 |
| 7  | 0.20 | 0.17 | 0.50 | 0.33 | 0.25 | 0.33 | 1    | 4.00 | 7.00 | 7.00 | 5.00 | 7.00 | 5.00 | 7.00 | 6.00 | 6.00 | 7.00 |
| 8  | 0.17 | 0.20 | 0.33 | 0.25 | 0.20 | 0.25 | 0.25 | 1    | 8.00 | 7.00 | 6.00 | 5.00 | 4.00 | 3.00 | 2.00 | 3.00 | 4.00 |
| 9  | 0.14 | 0.25 | 0.25 | 0.20 | 0.17 | 0.20 | 0.14 | 0.12 | 1    | 9.00 | 9.00 | 8.00 | 7.00 | 6.00 | 5.00 | 4.00 | 2.00 |
| 10 | 0.14 | 0.50 | 0.20 | 0.17 | 0.14 | 0.17 | 0.14 | 0.14 | 0.11 | 1    | 5.00 | 5.00 | 7.00 | 8.00 | 9.00 | 8.00 | 7.00 |
| 11 | 0.17 | 0.33 | 0.17 | 0.14 | 0.12 | 0.14 | 0.20 | 0.17 | 0.11 | 0.20 | 1    | 4.00 | 3.00 | 2.00 | 3.00 | 4.00 | 5.00 |
| 12 | 0.17 | 0.25 | 0.14 | 0.12 | 0.11 | 0.12 | 0.14 | 0.20 | 0.12 | 0.20 | 0.25 | 1    | 8.00 | 9.00 | 7.00 | 5.00 | 3.00 |
| 13 | 0.20 | 0.20 | 0.12 | 0.11 | 0.12 | 0.11 | 0.20 | 0.25 | 0.14 | 0.14 | 0.33 | 0.12 | 1    | 4.00 | 5.00 | 6.00 | 7.00 |
| 14 | 0.11 | 0.17 | 0.11 | 0.12 | 0.14 | 0.12 | 0.14 | 0.33 | 0.17 | 0.12 | 0.50 | 0.11 | 0.25 | 1    | 7.00 | 5.00 | 2.00 |
| 15 | 0.17 | 0.14 | 0.12 | 0.14 | 0.17 | 0.14 | 0.17 | 0.50 | 0.20 | 0.11 | 0.33 | 0.14 | 0.20 | 0.14 | 1    | 4.00 | 5.00 |
| 16 | 0.50 | 0.12 | 0.14 | 0.20 | 0.20 | 0.20 | 0.17 | 0.33 | 0.25 | 0.12 | 0.25 | 0.20 | 0.17 | 0.20 | 0.25 | 1    | 9.00 |
| 17 | 0.33 | 0.11 | 0.17 | 0.25 | 0.25 | 0.25 | 0.14 | 0.25 | 0.50 | 0.14 | 0.20 | 0.33 | 0.14 | 0.50 | 0.20 | 0.11 | 1    |
| 18 | 0.25 | 0.12 | 0.20 | 0.33 | 0.33 | 0.50 | 0.11 | 0.20 | 0.33 | 0.17 | 0.17 | 0.50 | 0.11 | 0.50 | 0.17 | 0.12 | 0.17 |
| 19 | 0.17 | 0.14 | 0.25 | 0.50 | 0.50 | 0.33 | 0.11 | 0.14 | 0.25 | 0.20 | 0.14 | 0.33 | 0.11 | 0.33 | 0.14 | 0.14 | 0.20 |

Number of comparisons = 171

**Consistency Ratio CR** = 35.4%

Principal eigen value = 29.377

Eigenvector solution: 11 iterations, delta = 3.5E-8

Table S3. Resulting weights for the criteria based on pairwise comparisons

| Cat |          | Priority | Rank | (+)   | (-)   |
|-----|----------|----------|------|-------|-------|
| 1   | pH       | 16.8%    | 1    | 19.6% | 19.6% |
| 2   | EC       | 15.5%    | 2    | 15.6% | 15.6% |
| 3   | BD       | 9.5%     | 3    | 6.2%  | 6.2%  |
| 4   | PD       | 8.1%     | 5    | 5.4%  | 5.4%  |
| 5   | Porosity | 8.2%     | 4    | 6.5%  | 6.5%  |
| 6   | WHC      | 7.0%     | 6    | 5.3%  | 5.3%  |
| 7   | OC       | 6.7%     | 7    | 5.6%  | 5.6%  |
| 8   | N        | 5.1%     | 8    | 6.2%  | 6.2%  |
| 9   | P        | 4.8%     | 9    | 5.9%  | 5.9%  |
| 10  | K        | 4.0%     | 10   | 3.3%  | 3.3%  |
| 11  | Ca       | 2.2%     | 12   | 1.8%  | 1.8%  |
| 12  | Mg       | 2.5%     | 11   | 3.1%  | 3.1%  |
| 13  | S        | 2.2%     | 13   | 2.1%  | 2.1%  |
| 14  | Fe       | 1.4%     | 16   | 1.7%  | 1.7%  |
| 15  | Mn       | 1.4%     | 15   | 1.4%  | 1.4%  |
| 16  | Cu       | 1.6%     | 14   | 2.0%  | 2.0%  |
| 17  | Zn       | 1.1%     | 17   | 1.1%  | 1.1%  |
